# Supplementary material for: Effects of the Human Gut Microbiota on Cognitive Performance, Brain Structure and Function: A Narrative Review
Source: PubMed Central journal article supplement (PMC7601389; doi:10.3390/nu12103009), 2020-09-30
Supplement: nutrients-12-03009-s001.pdf [file nutrients-12-03009-s001.pdf]

**Supplementary Table S1.** List of all excluded items describing point of exclusion and reason

| Author                                      | Year  | Experiment<br>/ Review | Type<br>Human (H),<br>animal. (A), n/a,<br>or unknown (?) | Excluded Y/N<br>(Level of exclusion and reason) |
|---------------------------------------------|-------|------------------------|-----------------------------------------------------------|-------------------------------------------------|
| - Chronic helminth infection                | 2018  | R                      | ?                                                         | Y – Title – Not relevant                        |
| Ye, L. et al. (erratum)                     | 2014  | E                      | A                                                         | Y – Title – Not relevant                        |
| - probiotic treatment<br>(Engineering news) | 2013  | ?                      | ?                                                         | Y – Title – Not relevant                        |
| Aagaard et al.                              | 2016a | E                      | A                                                         | Y – Title – Not relevant                        |
| Aagaard et al.                              | 2016b | E                      | A                                                         | Y – Title – Not relevant                        |
| Abdal.lah et al.                            | 2018  | E                      | n/a                                                       | Y – Title – Not appropriate                     |
| Aitbal.i et al.                             | 2018  | E                      | A                                                         | Y – Title – Not relevant                        |
| Akouche et al.                              | 2016  | E                      | n/a                                                       | Y – Title – Not appropriate                     |
| Al.cock et al.                              | 2014  | R                      | ?                                                         | Y – Title – Not appropriate                     |
| Al.exeev et al.                             | 2017  | E                      | A                                                         | Y – Title – Not relevant                        |
| Al.ifirova et al.                           | 2016  | E                      | H                                                         | Y – Title – Not relevant                        |
| Anderson et al.                             | 2016  | R                      | ?                                                         | Y – Title – Not appropriate                     |
| Armstrong et al.                            | 2018  | E                      | n/a                                                       | Y – Title – Not appropriate                     |
| Arseneault-Bréard et al.                    | 2012  | E                      | A                                                         | Y – Title – Not appropriate                     |
| Atia et al.                                 | 2018  | E                      | n/a                                                       | Y – Title – Not appropriate                     |
| Ayres                                       | 2016  | R                      | ?                                                         | Y – Title – Not appropriate                     |
| Azpiroz et al.                              | 2017  | E                      | H                                                         | Y – Title – Not relevant                        |
| Bachem et al.                               | 2017  | E                      | n/a                                                       | Y – Title – Not appropriate                     |
| Badri et al.                                | 2013  | E                      | A                                                         | Y – Title – Not relevant                        |
| Bal.l et al.                                | 2018  | E                      | A                                                         | Y – Title – Not relevant                        |
| Bambling et al.                             | 2017  | E                      | H                                                         | Y – Title – Not relevant                        |
| Beilharz et al.                             | 2016  | E                      | A                                                         | Y – Title – Not relevant                        |
| Belkaid et al.                              | 2016  | E                      | n/a                                                       | Y – Title – Not appropriate                     |
| Blunt et al.                                | 2015  | E                      | n/a                                                       | Y – Title – Not appropriate                     |
| Bokulich et al.                             | 2016  | E                      | n/a                                                       | Y – Title – Not appropriate                     |
| Borrelli et al.                             | 2016  | E                      | A                                                         | Y – Title – Not relevant                        |
| Bradshaw et al.                             | 2014  | E                      | H                                                         | Y – Title – Not relevant                        |
| Bruce-Keller et al.                         | 2017  | E                      | A                                                         | Y – Title – Not relevant                        |
| Caroll et al.                               | 2018  | E                      | H                                                         | Y – Title – Not relevant                        |
| Casotti et al.                              | 2017  | E                      | H                                                         | Y – Title – Not relevant                        |
| Chen, K et al.                              | 2017  | E                      | ?                                                         | Y – Title – Not appropriate                     |
| Cho, N. et al.                              | 2017  | E                      | A                                                         | Y – Title – Not relevant                        |
| Chrobak et al.                              | 2016  | R                      | H                                                         | Y – Title – Not relevant                        |
| Chunchai et al.                             | 2018  | E                      | A                                                         | Y – Title – Not relevant                        |
| Coleman et al.                              | 2014  | R                      | n/a                                                       | Y – Title – Not appropriate                     |
| Comstock et al.                             | 2017  | E                      | A                                                         | Y – Title – Not relevant                        |
| Corpuz et al.                               | 2018  | E                      | A                                                         | Y – Title – Not relevant                        |
| D’Mello et al.                              | 2014  | E                      | n/a                                                       | Y – Title – Not appropriate                     |
| Da Sliva et al.                             | 2012  | E                      | n/a                                                       | Y – Title – Not appropriate                     |
| Dal.lal. et al.                             | 2012  | E                      | n/a                                                       | Y – Title – Not appropriate                     |
| Daulatzai                                   | 2014  | R                      | ?                                                         | Y – Title – Not appropriate                     |
| Davis et al.                                | 2016  | E                      | A                                                         | Y – Title – Not relevant                        |
| Desbonnet et al.                            | 2010  | E                      | A                                                         | Y – Title – Not relevant                        |

| Author                   | Year  | Experiment / Review | Type<br>Human (H),<br>animal. (A), n/a,<br>or unknown (?) | Excluded Y/N<br>(Level of exclusion and reason) |
|--------------------------|-------|---------------------|-----------------------------------------------------------|-------------------------------------------------|
| Diviccaro et al.         | 2019  | E                   | A                                                         | Y – Title – Not relevant                        |
| Echeverry-Al.zate et al. | 2017  | E                   | ?                                                         | Y – Title – Not appropriate                     |
| Eisele et al.            | 2018  | E                   | H                                                         | Y – Title – Not relevant                        |
| El-Dieb et al.           | 2012  | E                   | n/a                                                       | Y – Title – Not appropriate                     |
| El-Kholy et al.          | 2014  | E                   | n/a                                                       | Y – Title – Not appropriate                     |
| Elder & Glickman-Simon   | 2013  | R                   | ?                                                         | Y – Title – Not appropriate                     |
| Engel et al.             | 2015  | E                   | ?                                                         | Y – Title – Not appropriate                     |
| Fakri et al.             | 2016  | E                   | n/a                                                       | Y – Title – Not appropriate                     |
| Famodu                   | 2016  | E                   | H                                                         | Y – Title – Not relevant                        |
| Fasano                   | 2017  | R                   | ?                                                         | Y – Title – Not appropriate                     |
| Feng, X. et al.          | 2017  | E                   | A                                                         | Y – Title – Not relevant                        |
| Fernandes et al.         | 2013  | E                   | n/a                                                       | Y – Title – Not appropriate                     |
| Fernando et al.          | 2018  | E                   | n/a                                                       | Y – Title – Not appropriate                     |
| Fetissov                 | 2017  | R                   | A                                                         | Y – Title – Not relevant                        |
| Fleming et al.           | 2017  | E                   | A                                                         | Y – Title – Not relevant                        |
| Fonken et al.            | 2018  | E                   | A                                                         | Y – Title – Not relevant                        |
| Forsatkar et al.         | 2017  | E                   | A                                                         | Y – Title – Not relevant                        |
| Forsythe & Bienenstock   | 2016a | R                   | ?                                                         | Y – Title – Not appropriate                     |
| Forsythe & Bienenstock   | 2016b | R                   | ?                                                         | Y – Title – Not appropriate                     |
| França & Lotti           | 2017  | R                   | H                                                         | Y – Title – Not relevant                        |
| Fukudo                   | 2016  | ?                   | ?                                                         | Y – Title – Not appropriate                     |
| Gaetani                  | 2011  | ?                   | ?                                                         | Y – Title – Not appropriate                     |
| Gato et al.              | 2018  | R                   | H                                                         | Y – Title – Not relevant                        |
| Geirnaert et al.         | 2013  | E                   | n/a                                                       | Y – Title – Not appropriate                     |
| Ghita et al.             | 2015  | E                   | n/a                                                       | Y – Title – Not appropriate                     |
| Gilbert et al.           | 2013  | E                   | A                                                         | Y – Title – Not relevant                        |
| Go, J. et al.            | 2016  | E                   | A                                                         | Y – Title – Not relevant                        |
| Grant & Baker            | 2017  | R                   | A+H                                                       | Y – Title – Not relevant                        |
| Groff et al.             | 2018  | E                   | A                                                         | Y – Title – Not relevant                        |
| Griffiths & Kikafunda    | 2015  | ?                   | H                                                         | Y – Title – Not relevant                        |
| Gu, C. et al.            | 2017  | E                   | A                                                         | Y – Title – Not relevant                        |
| Gu, F. et al.            | 2018  | E                   | n/a                                                       | Y – Title – Not appropriate                     |
| Guernier et al.          | 2017  | ?                   | H                                                         | Y – Title – Not relevant                        |
| Hassan. A.M. et al.      | 2017  | E                   | A                                                         | Y – Title – Not relevant                        |
| Hassan. A.M. et al.      | 2018  | E                   | A                                                         | Y – Title – Not relevant                        |
| Heijtz                   | 2016  | R                   | ?                                                         | Y – Title – Not appropriate                     |
| Heintz-Buschart et al.   | 2018  | E                   | H                                                         | Y – Title – Not relevant                        |
| Hernandez et al.         | 2018  | E                   | A                                                         | Y – Title – Not relevant                        |
| Heydari et al.           | 2018  | E                   | n/a                                                       | Y – Title – Not appropriate                     |
| Heyde & Ruder            | 2015  | E                   | n/a                                                       | Y – Title – Not appropriate                     |
| Hoffman et al.           | 2017  | E                   | ?                                                         | Y – Title – Not appropriate                     |
| Hoggard et al.           | 2018  | R                   | ?                                                         | Y – Title – Not appropriate                     |
| Hoisington et al.        | 2018  | R                   | ?                                                         | Y – Title – Not appropriate                     |
| Houdek                   | 2018  | R                   | ?                                                         | Y – Title – Not appropriate                     |
| Hu, S. et al.            | 2018a | E                   | H                                                         | Y – Title – Not relevant                        |
| Hu, S. et al.            | 2018b | E                   | H                                                         | Y – Title – Not relevant                        |
| Huang, S.-Y. et al.      | 2018  | E                   |                                                           | Y – Title – Not relevant                        |
| Ibrahim et al.           | 2018  | E                   | A                                                         | Y – Title – Not relevant                        |

| Author                      | Year  | Experiment / Review | Type<br>Human (H),<br>animal. (A), n/a,<br>or unknown (?) | Excluded Y/N<br>(Level of exclusion and reason) |
|-----------------------------|-------|---------------------|-----------------------------------------------------------|-------------------------------------------------|
| Jang, S.-E. et al.          | 2011  | E                   | A                                                         | Y – Title – Not relevant                        |
| Jenkins et al.              | 2016  | R                   | ?                                                         | Y – Title – Not appropriate                     |
| Jeong, J.-J. et al.         | 2015a | E                   | A                                                         | Y – Title – Not relevant                        |
| Jeong, J.-J. et al.         | 2015b | E                   | A                                                         | Y – Title – Not relevant                        |
| Jones, M.B. et al.          | 2017  | E                   | n/a                                                       | Y – Title – Not appropriate                     |
| Kaban et al.                | 2010  | E                   | n/a                                                       | Y – Title – Not appropriate                     |
| Kaczmarek et al.            | 2017  | E                   | ?                                                         | Y – Title – Not appropriate                     |
| Kadowaki et al.             | 2047  | ?                   | ?                                                         | Y – Title – Not appropriate                     |
| Kahl et al.                 | 2018  | R                   | ?                                                         | Y – Title – Not appropriate                     |
| Kang, S.S. et al.           | 2014  | ?                   | ?                                                         | Y – Title – Not appropriate                     |
| Kao, A. et al.              | 2018  | ?                   | ?                                                         | Y – Title – Not appropriate                     |
| Kargozari et al.            | 2015  | E                   | n/a                                                       | Y – Title – Not appropriate                     |
| Kelly, J.R. et al.          | 2016  | E                   | A                                                         | Y – Title – Not relevant                        |
| Kelsey et al.               | 2017  | E                   | A                                                         | Y – Title – Not relevant                        |
| Kennedy et al.              | 2016  | E                   | H                                                         | Y – Title – Not relevant                        |
| Khem et al.                 | 2016  | E                   | n/a                                                       | Y – Title – Not appropriate                     |
| Kim, J.S. & La Serre        | 2018  | R                   | ?                                                         | Y – Title – Not appropriate                     |
| Kleiman et al.              | 2015  | E                   | H                                                         | Y – Title – Not relevant                        |
| Knudsen et al.              | 2017  | ?                   | ?                                                         | Y – Title – Not appropriate                     |
| Kraimi et al.               | 2018  | E                   | A                                                         | Y – Title – Not relevant                        |
| Lach et al.                 | 2018  | R                   | ?                                                         | Y – Title – Not appropriate                     |
| Lakhtin et al.              | 2017  | E                   | H                                                         | Y – Title – Not relevant                        |
| Lawrence & Hyde             | 2017a | E                   | H                                                         | Y – Title – Not relevant                        |
| Lawrence & Hyde (retracted) | 2017b | E                   | H                                                         | Y – Title – Not relevant                        |
| Leclercq et al.             | 2017  | E                   | A                                                         | Y – Title – Not relevant                        |
| Leitão-Gonçalves et al.     | 2017  | E                   | A                                                         | Y – Title – Not relevant                        |
| Leung & Thuret              | 2015  | R                   | ?                                                         | Y – Title – Not appropriate                     |
| Lewis et al.                | 2017  | E                   | H                                                         | Y – Title – Not relevant                        |
| Lim et al.                  | 2017  | E                   | A                                                         | Y – Title – Not relevant                        |
| Liu, K. & He, R.            | 2017  | R                   | ?                                                         | Y – Title – Not appropriate                     |
| Liu, Y. et al.              | 2016  | E                   | H                                                         | Y – Title – Not relevant                        |
| López, P. et al.            | 2018  | E                   | A                                                         | Y – Title – Not relevant                        |
| Lu, J. et al.               | 2018  | E                   | A                                                         | Y – Title – Not relevant                        |
| Luna, R.A.                  | 2018  | E                   | H                                                         | Y – Title – Not relevant                        |
| Lv, F. et al.               | 2017  | E                   | H                                                         | Y – Title – Not relevant                        |
| Magalhães et al.            | 2017  | E                   | A                                                         | Y – Title – Not relevant                        |
| Mahmoud et al.              | 2018  | E                   | A                                                         | Y – Title – Not relevant                        |
| Manderino et al.            | 2017  | E                   | H                                                         | Y – Title – Not relevant                        |
| Mangiola et al.             | 2016  | R                   | ?                                                         | Y – Title – Not appropriate                     |
| Manook et al.               | 2016  | ?                   | ?                                                         | Y – Title – Not appropriate                     |
| Marques Ribeiro et al.      | 2012a | ?                   | ?                                                         | Y – Title – Not appropriate                     |
| Marques Ribeiro et al.      | 2012b | ?                   | ?                                                         | Y – Title – Duplicate                           |
| Massaro Jr et al.           | 2013  | E                   | A                                                         | Y – Title – Not relevant                        |
| Meyrel et al.               | 2018  | R                   | ?                                                         | Y – Title – Not appropriate                     |
| Mi, G.L. et al.             | 2015  | E                   | H                                                         | Y – Title – Not relevant                        |
| Mika et al.                 | 2017  | E                   | A                                                         | Y – Title – Not relevant                        |
| Moeller et al.              | 2016  | E                   | A                                                         | Y – Title – Not relevant                        |
| Moerkl et al.               | 2017  | E                   | H                                                         | Y – Title – Not relevant                        |

| Author                     | Year  | Experiment / Review | Type<br>Human (H),<br>animal. (A), n/a,<br>or unknown (?) | Excluded Y/N<br>(Level of exclusion and reason) |
|----------------------------|-------|---------------------|-----------------------------------------------------------|-------------------------------------------------|
| Moloney et al.             | 2014  | R                   | ?                                                         | Y – Title – Not appropriate                     |
| Moraes Correia et al.      | 2014  | E                   | n/a                                                       | Y – Title – Not appropriate                     |
| Muzny et al.               | 2013  | E                   | H                                                         | Y – Title – Not relevant                        |
| Nicola et al.              | 2016  | ?                   | ?                                                         | Y – Title – Not appropriate                     |
| Nunez et al.               | 2018  | E                   | A                                                         | Y – Title – Not relevant                        |
| O'Hagan                    | 2017  | E                   | A                                                         | Y – Title – Not relevant                        |
| Orikasa et al.             | 2016  | E                   | A                                                         | Y – Title – Not relevant                        |
| Pace et al.                | 2018  | E                   | A                                                         | Y – Title – Not relevant                        |
| Painold et al.             | 2018  | E                   | H                                                         | Y – Title – Not relevant                        |
| Pal.omba et al.            | 2012  | E                   | n/a                                                       | Y – Title – Not appropriate                     |
| Panee et al.               | 2018  | E                   | H                                                         | Y – Title – Not relevant                        |
| Park, S. et al.            | 2016  | E                   | A                                                         | Y – Title – Not relevant                        |
| Parois et al.              | 2017  | E                   | A                                                         | Y – Title – Not relevant                        |
| Patra et al.               | 2018` | E                   | n/a                                                       | Y – Title – Not appropriate                     |
| Pyndt Jørgensen            | 2015a | E                   | A                                                         | Y – Title – Not relevant                        |
| Pyndt Jørgensen            | 2015b | E                   | A                                                         | Y – Title – Not relevant                        |
| Qu, Y. et al.              | 2017  | E                   | A                                                         | Y – Title – Not relevant                        |
| Raulo et al.               | 2018  | E                   | A                                                         | Y – Title – Not relevant                        |
| Reininghaus et al.         | 2018  | E                   | H                                                         | Y – Title – Not relevant                        |
| Reis Scheider et al.       | 2018  | E                   | A                                                         | Y – Title – Not relevant                        |
| Rezaei et al.              | 2014  | E                   | n/a                                                       | Y – Title – Not appropriate                     |
| Rodriguez, M. et al.       | 2016  | R                   | ?                                                         | Y – Title – Not appropriate                     |
| Rodriguez, O. et al.       | 2011  | E                   | n/a                                                       | Y – Title – Not appropriate                     |
| Roman, P. et al.           | 2018a | R                   | ?                                                         | Y – Title – Not appropriate                     |
| Roman, P. et al.           | 2018b | E                   | H                                                         | Y – Title – Not relevant                        |
| Ross, S.M                  | 2017  | R                   | ?                                                         | Y – Title – Not appropriate                     |
| Ruchal.la, E.              | 2017  | ?                   | ?                                                         | Y – Title – Not appropriate                     |
| Saghafian-Hedengren et al. | 2018  | R                   | H                                                         | Y – Title – Not relevant                        |
| Sal.mazadeh et al.         | 2018  | E                   | ?                                                         | Y – Title – Not appropriate                     |
| Santos, W.P. et al.        | 2017  | E                   | A                                                         | Y – Title – Not relevant                        |
| Schembre et al.            | 2016  | E                   | H                                                         | Y – Title – Not relevant                        |
| Schnorr & Bachner          | 2016  | R                   | ?                                                         | Y – Title – Not appropriate                     |
| Schoemaker et al.          | 2018  | E                   | A                                                         | Y – Title – Not relevant                        |
| Selkrig et al.             | 2018  | E                   | n/a                                                       | Y – Title – Not appropriate                     |
| Seratlić et al.            | 2013  | E                   | n/a                                                       | Y – Title – Not appropriate                     |
| Sharma & Kanwar            | 2018  | E                   | n/a                                                       | Y – Title – Not appropriate                     |
| Shen, H                    | 2015  | R                   | ?                                                         | Y – Title – Not appropriate                     |
| Siddiqui & Harvey          | 2013  | R                   | ?                                                         | Y – Title – Not appropriate                     |
| Silva et al.               | 2011  | E                   | n/a                                                       | Y – Title – Not appropriate                     |
| Sim, H.L et al.            | 2013  | E                   | n/a                                                       | Y – Title – Not appropriate                     |
| Simko                      | 2017  | R                   | ?                                                         | Y – Title – Not appropriate                     |
| Siwek et al.               | 2017  | E                   | H                                                         | Y – Title – Not relevant                        |
| Soltani et al.             | 2018  | E                   | n/a                                                       | Y – Title – Not appropriate                     |
| Stevens, B.R. et al.       | 2018  | E                   | H                                                         | Y – Title – Not relevant                        |
| Stokes, C.S. et al.        | 2015  | E                   | H                                                         | Y – Title – Not relevant                        |
| Su, A. et al.              | 2018  | E                   | A                                                         | Y – Title – Not relevant                        |
| Sun, J et al.              | 2018  | E                   | A                                                         | Y – Title – Not relevant                        |
| Sylvia et al.              | 2017  | E                   | A                                                         | Y – Title – Not relevant                        |

| Author                          | Year  | Experiment / Review | Type | Excluded Y/N<br>(Level of exclusion and reason) |
|---------------------------------|-------|---------------------|------|-------------------------------------------------|
| Szymanska-Czerwinska & Bednarek | 2011  | E                   | A    | Y – Title – Not relevant                        |
| Tanriover et al.                | 2013  | R                   | ?    | Y – Title – Not appropriate                     |
| Tarr, A. et al.                 | 2015  | E                   | A    | Y – Title – Not relevant                        |
| Togher et al.                   | 2017  | E                   | H    | Y – Title – Not relevant                        |
| Togher et al.                   | 2017  | E (abstract)        | H    | Y – Title – Not relevant                        |
| Toyoda et al.                   | 2018  | E                   | A    | Y – Title – Not relevant                        |
| Trivedi, M et al.               | 2017  | R                   | ?    | Y – Title – Not appropriate                     |
| Turpin et al.                   | 2013  | E                   | A    | Y – Title – Not relevant                        |
| Val.-Laillet                    | 2017  | E                   | A    | Y – Title – Not relevant                        |
| Vanhoecke et al.                | 2016  | E                   | n/a  | Y – Title – Not appropriate                     |
| Vázquez, G. H. et al.           | 2017  | R                   | H&A  | Y – Title – Not relevant                        |
| Vijayendra & Gupta              | 2013  | E                   | n/a  | Y – Title – Not appropriate                     |
| Wang, G et al. 2018             | 2018  | E                   | A    | Y – Title – Not relevant                        |
| Wang, J et al.                  | 2016  | ? (abstract)        | ?    | Y – Title – Not appropriate                     |
| Wang, W.C. et al.               | 2018  | E                   | A    | Y – Title – Not relevant                        |
| Watson Ronald                   | 2015  | ?                   | ?    | Y – Title – Not appropriate                     |
| Waworuntu et al.                | 2017  | E                   | ?    | Y – Title – Not appropriate                     |
| Webb, B et al.                  | 2017  | E (abstract)        | ?    | Y – Title – Not appropriate                     |
| Wessells et al.                 | 2017  | E                   | H    | Y – Title – Not relevant                        |
| Woo, J.Y. et al.                | 2014  | E                   | A    | Y – Title – Not relevant                        |
| Woods, J.A. et al.              | 2016  | E                   | A    | Y – Title – Not relevant                        |
| Xiao, H.-w. et al.              | 2018  | E                   | A    | Y – Title – Not relevant                        |
| Xiao, J. et al.                 | 2014  | E                   | A    | Y – Title – Not relevant                        |
| Ye, L. et al.                   | 2014  | E                   | A    | Y – Title – Not relevant                        |
| Yu, M. et al.                   | 2017  | E                   | H    | Y – Title – Not relevant                        |
| Zalar, B et al.                 | 2018  | R                   | H    | Y – Title – Not relevant                        |
| Zanette et al.                  | 2015  | E                   | n/a  | Y – Title – Not appropriate                     |
| Zhao, X.H. et al.               | 2012  | E                   | n/a  | Y – Title – Not appropriate                     |
| Zhuikova et al.                 | 2017  | E                   | n/a  | Y – Title – Not appropriate                     |
| Аблеев, Д. Р                    | 2018  | ?                   | ?    | Y – Title – Not English                         |
| Алифинова, В. М.                | 2016  | ?                   | ?    | Y – Title – Not English                         |
| سحر فرزانه                      | 2018  | ?                   | ?    | Y – Title – Not English                         |
| 刘国荣, 任桂美, 李, 雪.,                | 2018  | ?                   | ?    | Y – Title – Not English                         |
| 徐, 娜., 李聪, 潘智华,                 | 2018  | ?                   | ?    | Y – Title – Not English                         |
| psychobiotic-revolution.com     |       | ?                   | grey | Y – Abstract – Not appropriate                  |
| Webpage: neutraceuticals World  | 2018  | ?                   | ?    | Y – Abstract – Not appropriate                  |
| Abildgaard, A. et al.           | 2014  | E (abstract)        | A    | Y – Abstract – animal. <2017                    |
| Agusti et al.                   | 2018  | ?                   | ?    | Y – Abstract – obesity                          |
| Allen, A.P. et al.              | 2016a | E (abstract)        | H    | Y – Abstract – no abstract                      |
| Allen, A.P. et al.              | 2016b | E (abstract)        | H    | Y – Abstract – no abstract                      |
| Anglin et al.                   | 2014  | E (abstract)        | H    | Y – Abstract – no abstract                      |
| Anglin et al.                   | 2016  | E (abstract)        | H    | Y – Abstract – no abstract                      |
| Arslanova et al.                | 2018  | E (abstract)        | A    | Y – Abstract – antibiotic int.                  |
| Avila-Nava et al.               | 2017  | E (abstract)        | A    | Y – Abstract – no abstract                      |
| Berg et al.                     | 2015  | E                   | A    | Y – Abstract – Not relevant                     |

| Author                  | Year  | Experiment / Review | Type                                        | Excluded Y/N                    |
|-------------------------|-------|---------------------|---------------------------------------------|---------------------------------|
|                         |       |                     | Human (H), animal. (A), n/a, or unknown (?) | (Level of exclusion and reason) |
| Biron et al.            | 2014  | R                   | ?                                           | Y – Abstract – Not relevant     |
| Braniste et al.         | 2014  | E                   | A                                           | Y – Abstract – Not relevant     |
| Buffington et al.       | 2016  | E                   | A                                           | Y – Abstract – Not relevant     |
| Burnet P                | 2015  | E (abstract)        | ?                                           | Y – Abstract – Not appropriate  |
| Cal.arge, C             | 2016  | E (abstract)        | ?                                           | Y – Abstract – Not appropriate  |
| Cal.laghan, B et al.    | 2016  | E                   | A                                           | Y – Abstract – Not relevant     |
| Carlson, A et al.       | 2016  | E                   | ?                                           | Y – Abstract – Not relevant     |
| Carlson, A et al.       | 2018  | E                   | H                                           | Y – Abstract – Not relevant     |
| Clarke & Cyran          | 2016  | R                   | ?                                           | Y – Abstract – Not appropriate  |
| Clarke, G. et al.       | 2012a | ?                   | ?                                           | Y – Abstract – Not appropriate  |
| Clarke, G. et al.       | 2012b | ?                   | ?                                           | Y – Abstract – Not appropriate  |
| Clarke, G. et al.       | 2014  | R                   | All?                                        | Y – Abstract – post natal.      |
| Cowan, C et al.         | 2016  | E                   | A                                           | Y – Abstract – Not relevant     |
| Craven, L et al.        | 2017  | E                   | A                                           | Y – Abstract – Not relevant     |
| Cryan, J.               | 2014  | R                   | ?                                           | Y – Abstract – Not appropriate  |
| Cryan, J.F.             | 2016  | R (abstract)        | A&H                                         | Y – Abstract – Not appropriate  |
| Cryan, J                | 2018  | R (abstract)        | A&H                                         | Y – Abstract – early develmt    |
| Cryan & Dinan           | 2014  | ?                   | ?                                           | Y – Abstract – no abstract      |
| Cryan & Dinan           | 2015  | ?                   | ?                                           | Y – Abstract – no abstract      |
| Cryan & Dinan           | 2015  | R (abstract)        | A&H                                         | Y – Abstract – early develmt    |
| Davari, S et al.        | 2012  | E                   | A                                           | Y – Abstract – Not relevant     |
| De Pal.ma, G. et al.    | 2012  | E (abstract)        | A                                           | Y – Abstract – Not relevant     |
| De Pal.ma, G. et al.    | 2014  | E (abstract)        | A                                           | Y – Abstract – Not relevant     |
| De Pal.ma, G. et al.    | 2017  | E                   | A&H                                         | Y – Abstract – Not relevant     |
| Desbonnet, L. et al.    | 2014  | E                   | A                                           | Y – Abstract – Not relevant     |
| Dinan, T & Cryan, J     | 2017  | R                   | A&H                                         | Y – Abstract – no abstract      |
| Dinan, T & Quigley, E.  | 2011  | R                   | ?                                           | Y – Abstract – no abstract      |
| Dinan, T et al.         | 2015  | R                   | A&H                                         | Y – Abstract – Not appropriate  |
| Eiwegger, T et al.      | 2010  | E                   | A                                           | Y – Abstract – Not relevant     |
| Elgazzar, O. et al.     | 2018  | E                   | A                                           | Y – Abstract – Not relevant     |
| Evrensel & Ceylan       | 2015  | R                   | ?                                           | Y – Abstract – Not relevant     |
| Ezenwa, V et al.        | 2012  | R                   | A                                           | Y – Abstract – Not relevant     |
| Farzaneh & Tafvizi      | 2018  | R                   | A                                           | Y – Abstract – not available    |
| Feuz & Ait-Belgnaoui    | 2015  | R                   | ?                                           | Y – Abstract – Not appropriate  |
| Forsythe, P et al.      | 2016  | R                   | A&H                                         | Y – Abstract – Not appropriate  |
| Foster, J               | 2015  | R (abstract)        | ?                                           | Y – Abstract – Not appropriate  |
| Foster, J & Neufeld K-A | 2013  | R                   | ?                                           | Y – Abstract – Duplicate        |
| Fröhlich, E et al.      | 2016  | E                   | A                                           | Y – Abstract – Duplicate        |
| Ghosh, D                | 2018  | R                   | ?                                           | Y – Abstract – Not appropriate  |
| Goudarzvand, M et al.   | 2016  | E                   | A                                           | Y – Abstract – Not relevant     |
| Gruber, K.              | 2012  | R                   | ?                                           | Y – Abstract – not English      |
| Gueveorkyan, A et al.   | 2018  | E                   | A                                           | Y – Abstract – Not relevant     |
| Gullón, P. et al.       | 2014  | E                   | n/a                                         | Y – Abstract – Not appropriate  |
| Hayley, S et al.        | 2016  | R                   | A&H                                         | Y – Abstract – Not relevant     |
| Hemmings, S et al.      | 2016  | E                   | H                                           | Y – Abstract – Not relevant     |
| Hsiao, E et al.         | 2013  | E                   | A                                           | Y – Abstract – Not relevant     |
| Huynh, K. et al.        | 2016  | R                   | ?                                           | Y – Abstract – Not relevant     |
| Inserra, A et al.       | 2018  | R                   | A&H                                         | Y – Abstract – Not relevant     |

| Author                       | Year  | Experiment / Review | Type | Excluded Y/N<br>(Level of exclusion and reason) |
|------------------------------|-------|---------------------|------|-------------------------------------------------|
| Jermy, A                     | 2011  | R (comment)         | A    | Y – Abstract – Not appropriate                  |
| John, N,                     | 2014  | R (comment)         | H    | Y – Abstract – Not appropriate                  |
| Kaelberer, M. & Bohorquez, D | 2018  | R (comment)         | ?    | Y – Abstract – Not appropriate                  |
| Kamimura, Y & Lanier, L      | 2013  | E                   | n/a  | Y – Abstract – Not appropriate                  |
| Kang, Y & Cai, Y.            | 2017  | R                   | ?    | Y – Abstract – Not appropriate                  |
| Kellman, R                   | 2017  | R (comment)         | ?    | Y – Abstract – Not appropriate                  |
| Kelly, J                     | 2015  | E (abstract)        | ?    | Y – Abstract – Not appropriate                  |
| Kelly, J. et al.             | 2016  | E (abstract)        | A    | Y – Abstract – Not appropriate                  |
| Koopman, M & El Aidy, S.     | 2017  | R                   | ?    | Y – Abstract – Not appropriate                  |
| Kramer, P. & Bressan, P.     | 2015  | R                   | al.l | Y – Abstract – Not relevant                     |
| Kretzschmar, A               | 2017  | R                   | ?    | Y – Abstract – not available                    |
| Kuti, D. et al.              | 2017  | E (abstract)        | A    | Y – Abstract – not available                    |
| Lewis, S.                    | 2011  | R (comment)         | A    | Y – Abstract – Not appropriate                  |
| Liang, S. et al.             | 2018  | R                   | A    | Y – Abstract – Not appropriate                  |
| Lim, S-M et al.              | 2017  | E                   | A    | Y – Abstract – Not relevant                     |
| Lindner, C. et al.           | 2015  | E                   | n/a  | Y – Abstract – Not relevant                     |
| Luk, B. et al.               | 2018  | E                   | A    | Y – Abstract – Not relevant                     |
| Luo, J. et al.               | 2014  | E                   | A    | Y – Abstract – Not appropriate                  |
| Lyte, M.                     | 2017  | ?                   | ?    | Y – Abstract – nil available                    |
| Lyte, M. et al.              | 2016  | E                   | A    | Y – Abstract – not relevant                     |
| Lyte, M. & Cryan, J          | 2014  | ?                   | ?    | Y – Abstract – nil available                    |
| Macedo, D. et al.            | 2017  | R                   | ?    | Y – Abstract – not related                      |
| MacMillan, A                 | 2017  | R (comment)         | A    | Y – Abstract – grey lit                         |
| Magnano, M. et al.           | 2012  | ?                   | ?    | Y – Abstract – nil English                      |
| Mal.ick, M. et al.           | 2015  | E                   | A    | Y – Abstract – not related                      |
| Mason, B. et al.             | 2017  | E (abstract)?       | ?    | Y – Abstract – nil available                    |
| McLean, P. et al.            | 2012a | E (abstract)?       | ?    | Y – Abstract – nil available                    |
| McLean, P. et al.            | 2012b | E (abstract)?       | ?    | Y – Abstract – nil available                    |
| Mediavilla, C. et al.        | 2015  | E (abstract)        | A    | Y – Abstract – nil available                    |
| Meyer, C. & Vassar, M.       | 2018  | R                   | H    | Y – Abstract – nil available                    |
| Mika, A. et al.              | 2018  | E                   | A    | Y – Abstract – juvenile                         |
| Misheneva, V. et al.         | 2018  | E (abstract)        | A    | Y – Abstract – nil available                    |
| Misra, S & Medhi, B          | 2013  | ?                   | ?    | Y – Abstract – letter/comment                   |
| Morris, A.                   | 2018  | R (comment)         | A    | Y – Abstract – comment                          |
| Murray, E.                   | 2016  | E (abstract)?       | ?    | Y – Abstract – nil available                    |
| O'Mahony, S. et al.          | 2016  | E                   | A    | Y – Abstract – nil available                    |
| Pace, R. et al.              | 2018  | E (abstract)        | A    | Y – Abstract – nil available                    |
| Panduro, A. et al.           | 2017  | R                   | ?    | Y – Abstract – gut disorders                    |
| Parikh, I. et al.            | 2017  | E (abstract)        | A    | Y – Abstract – nil available                    |
| Park, A. et al.              | 2013  | E                   | A    | Y – Abstract – not related                      |
| Park, C. et al.              | 2018  | R                   | ?    | Y – Abstract – immune focus                     |
| Pinto-Sanchez, M. et al.     | 2017  | E                   | H    | Y – Abstract – IBS                              |
| Pop, O.L. et al.             | 2016  | E                   | n/a  | Y – Abstract – food                             |
| Proctor, C. et al.           | 2017  | R                   | H&A  | Y – Abstract – diet                             |
| Pyndt Jørgensen, B, et al.   | 2014  | E                   | A    | Y – Abstract – food                             |
| Rackers, H.S. et al.         | 2018  | R                   | ?    | Y – Abstract – perinatal.                       |
| Rios. A. et al.              | 2017  | R                   | A&H  | Y – Abstract – not related                      |

| Author                        | Year  | Experiment / Review | Type                                        | Excluded Y/N                           |
|-------------------------------|-------|---------------------|---------------------------------------------|----------------------------------------|
|                               |       |                     | Human (H), animal. (A), n/a, or unknown (?) | (Level of exclusion and reason)        |
| Robertson, R.C. et al.        | 2017  | E                   | A                                           | Y – Abstract – $\omega$ -3 interaction |
| Said, A.                      | 2013  | ?                   | ?                                           | Y – Abstract – nil Eng                 |
| Sampson, R & Mazmanian, K     | 2015  | R                   | A                                           | Y – Abstract – perinatal.              |
| Sanchez, M et al.             | 2017  | E                   | H                                           | Y – Abstract – obesity                 |
| Savingnac, H. et al.          | 2016  | E                   | A                                           | Y – Abstract – Not appropriate         |
| Savingnac, H. et al.          | 2016  | E                   | A                                           | Y – Abstract – duplicate               |
| Schachter J. et al.           | 2018  | R                   | ?                                           | Y – Abstract – obesity+psych           |
| Schmidt, C.                   | 2015  | ?                   | ?                                           | Y – Abstract – nil available           |
| Seo, Y.C. et al.              | 2012  | E                   | A                                           | Y – Abstract – Not appropriate         |
| Sharon, G. et al.             | 2016  | R                   | All                                         | Y – Abstract – broad review            |
| Shropshire, J. et al.         | 2016  | R                   | ?                                           | Y – Abstract – Not appropriate         |
| Slykerman, R. et al.          | 2018  | E                   | H                                           | Y – Abstract – childhood               |
| Smith, A.P. et al.            | 2015  | E                   | H                                           | Y – Abstract – duplicate               |
| Smythies, L. et al.           | 2014  | R                   | ?                                           | Y – Abstract – no abstract             |
| Spanier, R.                   | 2018  | R (abstract)        | ?                                           | Y – Abstract – short comm.             |
| Spasova, D. & Surh, C.        | 2013  | R (abstract)        | ?                                           | Y – Abstract – short comm.             |
| Springen, K.                  | 2017  | ?                   | ?                                           | Y – Abstract – grey lit                |
| Stefaniak, A. et al.          | 2018  | ?                   | ?                                           | Y – Abstract – nil Eng                 |
| Stilling, R. et al.           | 2015  | E                   | A                                           | Y – Abstract – child developmt         |
| Takajo, T. et al.             | 2017  | E                   | A                                           | Y – Abstract – abstract only           |
| Thursby, E. & Juge, N.        | 2017  | R                   | ?                                           | Y – Abstract – not relevant            |
| Tillman, S. et al.            | 2017  | E (abstract)        | A                                           | Y – Abstract – not relevant            |
| Timmis, K. et al.             | 2017  | ?                   | ?                                           | Y – Abstract – editorial.              |
| Tochitani, S. et al.          | 2016  | E                   | A                                           | Y – Abstract – paedes                  |
| Torres, E.R.S. et al.         | 2018  | E                   | A                                           | Y – Abstract – Parkinson's             |
| Tottenham, N, et al.          | 2017  | ?                   | ?                                           | Y – Abstract – no abstract             |
| Toyoda, A. et al.             | 2017  | E                   | A                                           | Y – Abstract – no abstract             |
| van Baarlen, P et al.         | 2011  | E                   | n/a                                         | Y – Abstract – cellular                |
| Van Hemert, S. et al.         | 2015  | R (abstract)        | A&H                                         | Y – Abstract – psych focus             |
| Van Hemert, S. et al.         | 2016  | R (abstract)        | ?                                           | Y – Abstract – psych focus             |
| Vitetta, L. et al.            | 2014  | R                   | ?                                           | Y – Abstract – commentary              |
| Vlainić, J. et al.            | 2016  | R                   | ?                                           | Y – Abstract – not relevant            |
| Vuong, H.E. et al.            | 2017  | R                   | ?                                           | Y – Abstract – not relevant            |
| Wallace, C. et al.            | 2018  | E (abstract)        |                                             | Y – Abstract – not relevant            |
| Wallace, C & Milev, R.        | 2017  | R                   | H                                           | Y – Abstract – Incorrect excl          |
| Wallace, C. & Milev, R.       | 2017  | R                   | H                                           | Y – Abstract – erratum                 |
| Waworuntu, R. et al.          | 2014a | E (abstract)        | A                                           | Y – Abstract – development             |
| Waworuntu, R. et al.          | 2014b | E (abstract)        | A                                           | Y – Abstract – development             |
| Waworuntu, R. et al.          | 2014c | E (abstract)        | A                                           | Y – Abstract – development             |
| Winter, G. et al.             | 2018  | R                   | A&H                                         | Y – Abstract – Not appropriate         |
| Wong, M. et al.               | 2016  | E                   | n/a                                         | Y – Abstract – cellular                |
| Xie, P.                       | 2017  | E (abstract)        | A                                           | Y – Abstract – mol. Pathway            |
| Xinyan, P. et al.             | 2014  | E                   | A                                           | Y – Abstract – aging                   |
| Xu, N. et al.                 | 2018  | E                   | A                                           | Y – Abstract – gut disease             |
| <b>Relevant but excluded:</b> |       |                     |                                             |                                        |
| <b>Animal. Studies</b>        |       |                     |                                             |                                        |
| Abdrabou, A. M. et al.        | 2018  | E                   | A                                           | Y – Abstract – animal.                 |



| Author                                | Year  | Experiment / Review | Type | Excluded Y/N<br>(Level of exclusion and reason) |
|---------------------------------------|-------|---------------------|------|-------------------------------------------------|
| Abildgaard, A. et al.                 | 2017a | E                   | A    | Y – Abstract – animal.                          |
| Abildgaard, A. et al.                 | 2017b | E                   | A    | Y – Abstract – animal.                          |
| Ait-Belgnaoui, A. et al.              | 2012  | E                   | A    | Y – Abstract – animal.                          |
| Avolio, E. et al.                     | 2019  | E                   | A    | Y – Abstract – animal.                          |
| Bangsgaard Bendtsen et al.            | 2012  | E                   | A    | Y – Abstract – Animal.                          |
| Beilharz, J. E. et al.                | 2018  | E                   | A    | Y – Abstract – animal.                          |
| Bercik, P. et al.                     | 2011  | E                   | A    | Y – Abstract – animal.                          |
| Bharwani, A. et al.                   | 2016  | E                   | A    | Y – Abstract – animal.                          |
| Bharwani, A. et al.                   | 2017  | E                   | A    | Y – Abstract – animal.                          |
| Bravo, J. A. et al.                   | 2011  | E                   | A    | Y – Abstract – animal.                          |
| Burokas, A. et al.                    | 2017  | E                   | A    | Y – Abstract – animal.                          |
| Campos, A. C. et al.                  | 2016  | E                   | A    | Y – Abstract – animal.                          |
| Ceylani, T. et al.                    | 2018  | E                   | A    | Y – Abstract – animal.                          |
| Crumeyrole-Arias, M. et al.           | 2014  | E                   | A    | Y – Abstract – animal.                          |
| D’Mello, C. et al.                    | 2015  | E                   | A    | Y – Abstract – animal.                          |
| Davari, S. et al.                     | 2013  | E                   | A    | Y – Abstract – animal.                          |
| Davis, D. J. et al.                   | 2017  | E                   | A    | Y – Abstract – animal.                          |
| De Pal.ma, G. et al.                  | 2014  | E                   | A    | Y – Abstract – animal.                          |
| Denou, E. et al.                      | 2011  | E (abstract)        | A    | Y – Abstract – animal.                          |
| Desbonnet, L. et al.                  | 2015a | E                   | A    | Y – Abstract – animal.                          |
| Desbonnet, L. et al.                  | 2015b | E                   | A    | Y – Abstract – animal.                          |
| Dhal.iwal, J. et al.                  | 2018  | E                   | A    | Y – Abstract – animal.                          |
| Distrutti, E. et al.                  | 2014  | E                   | A    | Y – Abstract – animal.                          |
| Ermolenko, E. I. et al.               | 2018  | E                   | A    | Y – Abstract – animal.                          |
| Erny, D. et al.                       | 2015  | E                   | A    | Y – Abstract – animal.                          |
| Fox, J. H. et al.                     | 2017  | E                   | A    | Y – Abstract – animal.                          |
| Frank, M. G. et al.                   | 2018  | E                   | A    | Y – Abstract – animal.                          |
| Fröhlich, E. E. et al.                | 2016  | E                   | A    | Y – Abstract – animal.                          |
| Gacias, M. et al.                     | 2016  | E                   | A    | Y – Abstract – animal.                          |
| Gronier, B. et al.                    | 2018  | E                   | A    | Y – Abstract – animal.                          |
| Guida, F. et al.                      | 2018  | E                   | A    | Y – Abstract – animal.                          |
| Hoban, A. E. et al.                   | 2016  | E                   | A    | Y – Abstract – animal.                          |
| Hoban, A. E. et al.                   | 2017a | E                   | A    | Y – Abstract – animal.                          |
| Hoban, A. E. et al.                   | 2017b | E                   | A    | Y – Abstract – animal.                          |
| Hoban, A. E. et al.                   | 2018  | E                   | A    | Y – Abstract – animal.                          |
| Huo, R. et al.                        | 2017  | E                   | A    | Y – Abstract – animal.                          |
| Jaglin, M. et al.                     | 2018  | E                   | A    | Y – Abstract – animal.                          |
| Jang, H.-M, Lim, S. et al.            | 2018a | E                   | A    | Y – Abstract – animal.                          |
| Jang, H.-M., Lee, K.-E. et al.        | 2008b | E                   | A    | Y – Abstract – animal.                          |
| Janik, R. et al.                      | 2016  | E                   | A    | Y – Abstract – animal.                          |
| Jung, I. H. et al.                    | 2012  | E                   | A    | Y – Abstract – animal.                          |
| Kantak, P. A. et al.                  | 2014  | E                   | A    | Y – Abstract – animal.                          |
| Kelly, J. R. et al.                   | 2016  | E                   | A    | Y – Abstract – animal.                          |
| Kish, L. et al.                       | 2011  | E (abstract)        | A    | Y – Abstract – animal.                          |
| Lee, H. J., Jeong, J. J. et al.       | 2018a | E                   | A    | Y – Abstract – animal.                          |
| Lee, H. J., Kim, D. H. & Hwang, Y. H. | 2018b | E                   | A    | Y – Abstract – animal.                          |

| Author                                              | Year  | Experiment / Review | Type | Excluded Y/N<br>(Level of exclusion and reason) |
|-----------------------------------------------------|-------|---------------------|------|-------------------------------------------------|
| Lee, H. J., Kim, D. H. and Lim, S. M.               | 2018c | E                   | A    | Y – Abstract – animal.                          |
| Liang, S. et al.                                    | 2015  | E                   | A    | Y – Abstract – animal.                          |
| Liu, W.-H. et al.                                   | 2016  | E                   | A    | Y – Abstract – animal.                          |
| Loupy, K. M. et al.                                 | 2018  | E                   | A    | Y – Abstract – animal.                          |
| Luo, Y. et al.                                      | 2018  | E                   | A    | Y – Abstract – animal.                          |
| Lyte, M. et al.                                     | 2016  | E                   | A    | Y – Abstract – animal.                          |
| Magnusson, K. R. et al.                             | 2015  | E                   | A    | Y – Abstract – animal.                          |
| Marin, I. A. et al.                                 | 2017  | E                   | A    | Y – Abstract – animal.                          |
| Matthews, D. M. & Jenks, S. M.                      | 2013  | E                   | A    | Y – Abstract – animal.                          |
| McVey Neufeld, K. A.                                | 2015  | E                   | A    | Y – Abstract – animal.                          |
| McVey Neufeld, K. A.                                | 2017  | E                   | A    | Y – Abstract – animal.                          |
| McVey Neufeld, K. A.                                | 2018  | E                   | A    | Y – Abstract – animal.                          |
| Neufeld, K. A. et al.                               | 2011a | E                   | A    | Y – Abstract – animal.                          |
| Neufeld, K. A. et al.                               | 2011b | E                   | A    | Y – Abstract – animal.                          |
| Nishino, R. et al.                                  | 2013  | E                   | A    | Y – Abstract – animal.                          |
| Ogbonnaya, E. S. et al.                             | 2015  | E                   | A    | Y – Abstract – animal.                          |
| Ohland, C. L. et al.                                | 2013  | E                   | A    | Y – Abstract – animal.                          |
| Ohsawa, K. et al.                                   | 2015  | E                   | A    | Y – Abstract – animal.                          |
| Payet, J. M. et al.                                 | 2018  | E                   | A    | Y – Abstract – animal.                          |
| Perez-Burgos, A. et al.                             | 2013  | E                   | A    | Y – Abstract – animal.                          |
| Perez-Burgos, A. et al.                             | 2014  | E                   | A    | Y – Abstract – animal.                          |
| Savignac, H. M. et al.                              | 2013  | E                   | A    | Y – Abstract – animal.                          |
| Savignac, H. M. et al.                              | 2015  | E                   | A    | Y – Abstract – animal.                          |
| Siebler, P. H. et al.                               | 2018  | E                   | A    | Y – Abstract – animal.                          |
| Tarr, A. J. et al.                                  | 2015  | E                   | A    | Y – Abstract – animal.                          |
| Tillmann, S. et al.                                 | 2018  | E                   | A    | Y – Abstract – animal.                          |
| Tillman, S and Wegener, G.                          | 2018  | E                   | A    | Y – Abstract – animal.                          |
| Vicentini, F. A. et al.                             | 2018  | E                   | A    | Y – Abstract – animal.                          |
| Wang, T. et al.                                     | 2015  | E                   | A    | Y – Abstract – animal.                          |
| Winther, G. et al.                                  | 2015  | E                   | A    | Y – Abstract – animal.                          |
| Zeng, L., Zeng, B. et al.                           | 2016  | E                   | A    | Y – Abstract – animal.                          |
| <i>Narrative review or grey lit.</i>                |       |                     |      |                                                 |
| Al.len. A. P. et al.                                | 2017  | R                   | H    | Y – Abstract – narrative                        |
| Al.per, E. & Mehmet Emin, C.                        | 2017  | R                   | H    | Y – Abstract – narrative                        |
| Anderson, S. C. et al.                              | 2017  | R                   | H    | Y – Abstract – narrative                        |
| Archie, E. A. & Tung, J.                            | 2015  | R                   | H    | Y – Abstract – narrative                        |
| Arcidiacono, S. et al.                              | 2018  | R                   | All  | Y – Abstract – narrative                        |
| Baily, M. T. & Cryan, J. F.                         | 2017  | R                   | A&H  | Y – Abstract – narrative                        |
| Barrett, E. et al.                                  | 2013  | R                   | ?    | Y – Abstract – narrative                        |
| Bienenstock, J. et al.                              | 2013  | R                   |      | Y – Abstract – narrative                        |
| Borre, Y. E. et al.                                 | 2014  | R                   |      | Y – Abstract – narrative                        |
| Can probiotics alleviate stress and mood disorders? | 2013  | R                   | grey | Y – Abstract – narrative                        |

| Author                              | Year  | Experiment / Review | Type<br>Human (H),<br>animal. (A), n/a,<br>or unknown (?) | Excluded Y/N<br>(Level of exclusion and reason) |
|-------------------------------------|-------|---------------------|-----------------------------------------------------------|-------------------------------------------------|
| Cawthon, C. R. & de La Serre, C. B. | 2018  | R                   |                                                           | Y – Abstract – narrative                        |
| Collins, Kassam, Bercik             | 2013  | R                   |                                                           | Y – Abstract – narrative                        |
| Cryan, J. F. & Clarke, G.           | 2016  | R                   |                                                           | Y – Abstract – narrative                        |
| Cryan, J. F. & Dinan, T. G.         | 2012  | R                   |                                                           | Y – Abstract – narrative                        |
| Cryan, J. F. & Dinan, T. G.         | 2015  | R                   |                                                           | Y – Abstract – narrative                        |
| Cryan, J. F. & Dinan, T. G.         | 2019  | R                   |                                                           | Y – Abstract – narrative                        |
| Cryan, J. F. & O'Mahony, S. M.      | 2011  | R                   |                                                           | Y – Abstract – narrative                        |
| Dash, S. et al.                     | 2015  | R                   |                                                           | Y – Abstract – narrative                        |
| Davidson, G. L.                     | 2018  | R                   |                                                           | Y – Abstract – narrative                        |
| Dinan, T. G. & Cryan, J. F.         | 2013  | R                   |                                                           | Y – Abstract – narrative                        |
| Dinan, T. G. & Cryan, J. F.         | 2015  | R                   |                                                           | Y – Abstract – narrative                        |
| Dinan, T. G. & Cryan, J. F.         | 2017a | R                   |                                                           | Y – Abstract – narrative                        |
| Dinan, T. G. & Cryan, J. F.         | 2017b | R                   |                                                           | Y – Abstract – narrative                        |
| Dinan, T. G., et al.                | 2013  | R                   |                                                           | Y – Abstract – narrative                        |
| Donovan, S. M.                      | 2017  | R                   |                                                           | Y – Abstract – narrative                        |
| Forsythe, P. et al.                 | 2016  | R                   |                                                           | Y – Abstract – narrative                        |
| Foster, J. A.                       | 2016  | R                   |                                                           | Y – Abstract – narrative                        |
| Frank, M. G. et al.                 | 2018  | R                   |                                                           | Y – Abstract – narrative                        |
| Gareau, M. G.                       | 2014  | R                   |                                                           | Y – Abstract – narrative                        |
| Gareau, M. G.                       | 2016  | R                   |                                                           | Y – Abstract – narrative                        |
| Gayathri, D. & Rashmi, B. S.        | 2017  | R                   |                                                           | Y – Abstract – narrative                        |
| Gilbert, J. A. et al.               | 2018  | R                   |                                                           | Y – Abstract – narrative                        |
| Glaven, S. et al.                   | 2018  | R                   |                                                           | Y – Abstract – narrative                        |
| Goldman, E.                         | 2018  | R                   |                                                           | Y – Abstract – narrative                        |
| Greener, M.                         | 2018  | R                   |                                                           | Y – Abstract – narrative                        |
| Gulati, G. & Mulryan, D.            | 2018  | R                   |                                                           | Y – Abstract – narrative                        |
| Heijtz, R. D. et al.                | 2011  | R                   |                                                           | Y – Abstract – narrative                        |
| Johnson, K & Foster, K.             | 2018  | R                   |                                                           | Y – Abstract – narrative                        |
| Kane, L & Kinzel, J.                | 2018  | R                   |                                                           | Y – Abstract – narrative                        |
| Karakula-Juchnowicz, H. et al.      | 2016  | R                   |                                                           | Y – Abstract – narrative                        |
| Kelly, J. R. et al.                 | 2015  | R                   |                                                           | Y – Abstract – narrative                        |
| Kuo, P. H & Chung, Y. C. E.         | 2018  | R                   |                                                           | Y – Abstract – narrative                        |
| Langgartner, D. et al.              | 2019  | R                   |                                                           | Y – Abstract – narrative                        |
| Lewis, A.                           | 2017  | R                   |                                                           | Y – Abstract – narrative                        |
| Licinio, J. et al.                  | 2017  | R                   |                                                           | Y – Abstract – narrative                        |
| Lima-Ojeda, J. M. et al.            | 2017  | R                   |                                                           | Y – Abstract – narrative                        |
| Liu, L. & Zhu, G.                   | 2018  | R                   |                                                           | Y – Abstract – narrative                        |
| Luczynski, P. et al.                | 2016a | R                   |                                                           | Y – Abstract – narrative                        |
| Luczynski, P. et al.                | 2016b | R                   |                                                           | Y – Abstract – narrative                        |
| Luna, R. A. & Foster, J. A.         | 2015  | R                   |                                                           | Y – Abstract – narrative                        |
| Lyte, M.                            | 2013  | R                   |                                                           | Y – Abstract – narrative                        |
| Lyte, M.                            | 2014  | R                   |                                                           | Y – Abstract – narrative                        |
| Malan-Muller, S. et al.             | 2018  | R                   |                                                           | Y – Abstract – narrative                        |
| Mohajeri, M. H. et al.              | 2018  | R                   |                                                           | Y – Abstract – narrative                        |
| Montiel-Castro, A. J. et al.        | 2013  | R                   |                                                           | Y – Abstract – narrative                        |

| Author                               | Year  | Experiment / Review | Type | Excluded Y/N<br>(Level of exclusion and reason) |
|--------------------------------------|-------|---------------------|------|-------------------------------------------------|
| Münger, E. et al.                    | 2018  | R                   |      | Y – Abstract – narrative                        |
| Noble, E. et al.                     | 2017  | R                   |      | Y – Abstract – narrative                        |
| Ntranos, A & Casaccia, P.            | 2018  | R                   |      | Y – Abstract – narrative                        |
| O'Mahony, S. M. et al.               | 2015  | R                   |      | Y – Abstract – narrative                        |
| Oaklander, M.                        | 2015  | R                   | Grey | Y – Abstract – narrative                        |
| Osadchiy, V. et al.                  | 2018  | R                   |      | Y – Abstract – narrative                        |
| Parashar, A. & Udayananu, M.         | 2016  | R                   |      | Y – Abstract – narrative                        |
| Prebiotics may help ease (grey)      | 2015  | R                   |      | Y – Abstract – narrative                        |
| Probiotics may help address (grey)   | 2015  | R                   |      | Y – Abstract – narrative                        |
| Pusceddu, M, M.                      | 2018  | R                   |      | Y – Abstract – narrative                        |
| Rogers, G. B.                        | 2016  | R                   |      | Y – Abstract – narrative                        |
| Sarkar, A.                           | 2016  | R                   |      | Y – Abstract – narrative                        |
| Sarkar, A.                           | 2018  | R                   |      | Y – Abstract – narrative                        |
| Selhub, E. M.                        | 2014  | R                   |      | Y – Abstract – narrative                        |
| Stamper, C. E. et al.                | 2016  | R                   |      | Y – Abstract – narrative                        |
| Stilling, R. M. et al.               | 2014a | R                   |      | Y – Abstract – narrative                        |
| Stilling, R. M. et al.               | 2014b | R                   |      | Y – Abstract – narrative                        |
| Sylvia, K. E. & Demas, G. E.         | 2018  | R                   |      | Y – Abstract – narrative                        |
| Taverniti, V. & Guglielmetti, S.     | 2011  | R                   |      | Y – Abstract – narrative                        |
| Waclawiková, B. & El Aidy, S.        | 2018  | R                   |      | Y – Abstract – narrative                        |
| <b>Systematic Literature Reviews</b> |       |                     |      |                                                 |
| Brenner, L. A. et al.                | 2017  | R                   | H    | Y – Abstract – SLR                              |
| Clark, A. & Mach, N.                 | 2016  | R                   | H    | Y – Abstract – SLR                              |
| Huang, R. et al.                     | 2016  | R                   | H    | Y – Abstract – SLR                              |
| Liu, B, et al.                       | 2018  | R                   | H    | Y – Abstract – SLR – probiotics                 |
| Ng, Q. X. et al.                     | 2018  | R                   | H    | Y – Abstract – SLR – probiotics                 |
| Pirbaglou, M, et al.                 | 2016  | R                   | H    | Y – Abstract – SLR – probiotics                 |
| Romijn, A. R. & Rucklidge, J. J.     | 2015  | R                   | H    | Y – Abstract – SLR                              |
| Slyepchenko, A. et al.               | 2014  | R                   | H    | Y – Abstract – SLR – probiotics                 |
| Slyepchenko, A. et al.               | 2017  | R                   | H    | Y – Abstract – SLR                              |
| Wang, H. et al.                      | 2016  | R                   | H&A  | Y – Abstract – SLR                              |
| <b>Excluded Full Review</b>          |       |                     |      |                                                 |
| Akkasheh, G. et al.                  | 2016  | E                   | H    | Y – Full – depression                           |
| Cepeda, M. S. et al.                 | 2017  | E                   | H    | Y – Full – depression                           |
| Colica, C. et al.                    | 2017  | E                   | H    | Y – Full – stress & anxiety                     |
| Culpepper, T. et al.                 | 2016  | E                   | H    | Y – Full – stress & anxiety                     |
| Kazemi, A. et al.                    | 2018  | E                   | H    | Y – Full – depression                           |
| Messaoudi, M. et al.                 | 2011a | E                   | H    | Y – Full – stress & anxiety                     |
| Messaoudi, M. et al.                 | 2011b | E                   | H    | Y – Full – stress & anxiety                     |

| Author                   | Year | Experiment / Review | Type | Excluded Y/N                     |
|--------------------------|------|---------------------|------|----------------------------------|
| Mohammadi, A. A. et al.  | 2016 | E                   | H    | Y – Full – stress & anxiety      |
| Murata, M. et al.        | 2018 | E                   | H    | Y – Full – stress & anxiety      |
| Nishida, K. et al.       | 2017 | E                   | H    | Y – Full – stress & anxiety      |
| Nishihira, J. et al.     | 2014 | E                   | H    | Y – Full – stress & anxiety      |
| Noorwal.i, E. A. et al.  | 2017 | E                   | H    | Y – Full – stress & anxiety      |
| Owen, L. et al.          | 2014 | E (abstract)        | H    | Y – Full – < 2017                |
| Perez-Cornago, A. et al. | 2016 | E                   | H    | Y – Full – depression            |
| Romijn, A. R. et al.     | 2017 | E                   | H    | Y – Full – depression & anxiety  |
| Sawada, D. et al.        | 2017 | E                   | H    | Y – Full – stress & anxiety      |
| Shinkai, S. et al.       | 2013 | E                   | H    | Y – Full – immune only           |
| Slykerman, R. F. et al.  | 2017 | E                   | H    | Y – Full – depression & anxiety  |
| Steenbergen, L. et al.   | 2015 | E                   | H    | Y – Full – mood                  |
| Takada, M. et al.        | 2016 | E                   | H&A  | Y – Full – stress                |
| Takada, M. et al.        | 2017 | E                   | H    | Y – Full – environmental. stress |
| Tal.lbot, S. et al.      | 2018 | E (abstract)        | H    | Y – Full – multi-psych           |

List of abbreviations: Experiment (E); Review (R); Human (H), Animal. (A), not applicable (n/a); unknown (?); yes (Y); systematic literature review (SLR)
